# Supplementary material for: Balance between a Higher Degree of Heterosis and Increased Reproductive Isolation: A Strategic Design for Breeding Inter-Subspecific Hybrid Rice
Source: PLoS One. 2014 Mar 25;9(3):e93122. doi: 10.1371/journal.pone.0093122 (PMC3965518; doi:10.1371/journal.pone.0093122)
Supplement: File S1 — Phenotypic data. (XLSX) [file pone.0093122.s001.xlsx]

## Sheet: Phenotypic data of 12 inbreds
Name	Fi	GNP	GWP(g)	TPP	SSR	TGW(g)	MSPH(cm)
R465	1	216.749	49.5188	11.2413	0.827005	24.8424	133.205
Mianhui725	0.92	177.993	40.7195	9.64935	0.842219	28.3699	133.899
610234	0.88	172.24	34.1307	10.6623	0.709126	27.514	121.214
9311K	0.82	158.615	41.7073	11.4231	0.900137	26.6607	132.957
Qianlijing	0.7	403.337	27.9485	4.92698	0.723813	19.3791	118.72
W1384	0.33	286.941	37.7954	8.22222	0.754746	21.4445	137.918
W1383	0.3	224.592	13.8812	4.88889	0.663073	18.3096	128.194
W1392	0.2	194.92	27.8532	6.88889	0.793611	25.8729	121.464
W1390	0.18	231.027	29.601	6.47727	0.815692	24.9439	127.885
Liaoxing1	0.12	202.388	38.5526	10.6167	0.692205	27.7398	144.79
Wuyunjing8	0.02	97.4562	15.9139	9.06944	0.701265	24.4498	89.2056
Balilla	0	133.553	20.08	9.59524	0.699422	23.7528	93.2663

## Sheet: LPH
GDI	Female/Male parent name	GNP	GWP(g)	TPP	SSR	TGW(g)	MSPH(cm)	Female-GNP	Female-GWP(g)	Female-TPP	Female-SSR	Female-TGW(g)	Female-MSPH(cm)	Male-GNP	Male-GWP(g)	Male-TPP	Male-SSR	Male-TGW(g)	Male-MSPH(cm)	LP-GNP	LP-GWP(g)	LP-TPP	LP-SSR	LP-TGW(g)	LP-MSPH(cm)	LPH-GNP	LPH-GWP	LPH-TPP	LPH-SSR	LPH-TGW	LPH-MSPH
0.02	W1392/W1390	194.754	29.1183	6.58333	0.867161	26.8174	126.536	194.92	27.8532	6.88889	0.793611	25.8729	121.464	231.027	29.601	6.47727	0.815692	24.9439	127.885	194.92	27.8532	6.47727	0.793611	24.9439	121.464	-0.000851319	0.0454226	0.0163743	0.0926773	0.0751093	0.0417591
0.02	W1390/W1392	215.458	29.5825	6.44444	0.757051	24.597	132.697	231.027	29.601	6.47727	0.815692	24.9439	127.885	194.92	27.8532	6.88889	0.793611	25.8729	121.464	194.92	27.8532	6.47727	0.793611	24.9439	121.464	0.105368	0.0620867	-0.00506823	-0.0460685	-0.013905	0.0924783
0.02	Wuyunjing8/Balilla	152.994	28.0577	11.0833	0.631904	26.2244	116.655	97.4562	15.9139	9.06944	0.701265	24.4498	89.2056	133.553	20.08	9.59524	0.699422	23.7528	93.2663	97.4562	15.9139	9.06944	0.699422	23.7528	89.2056	0.569872	0.763095	0.222052	-0.0965341	0.104058	0.307707
0.02	Balilla/Wuyunjing8	154.137	16.0713	8	0.469111	26.1028	106.35	133.553	20.08	9.59524	0.699422	23.7528	93.2663	97.4562	15.9139	9.06944	0.701265	24.4498	89.2056	97.4562	15.9139	9.06944	0.699422	23.7528	89.2056	0.581607	0.00989171	-0.117917	-0.329288	0.0989353	0.19219
0.03	W1384/W1383	286.474	39.5319	7.88889	0.833056	20.8234	149.378	286.941	37.7954	8.22222	0.754746	21.4445	137.918	224.592	13.8812	4.88889	0.663073	18.3096	128.194	224.592	13.8812	4.88889	0.663073	18.3096	128.194	0.275534	1.84787	0.613636	0.256357	0.137293	0.165247
0.03	W1383/W1384	259.876	34.3581	6.27778	0.841548	24.5166	129.144	224.592	13.8812	4.88889	0.663073	18.3096	128.194	286.941	37.7954	8.22222	0.754746	21.4445	137.918	224.592	13.8812	4.88889	0.663073	18.3096	128.194	0.157103	1.47515	0.284091	0.269163	0.338999	0.00741374
0.04	Mianhui725/610234	205.024	64.4924	11.8889	0.91325	29.0056	142.226	177.993	40.7195	9.64935	0.842219	28.3699	133.899	172.24	34.1307	10.6623	0.709126	27.514	121.214	172.24	34.1307	9.64935	0.709126	27.514	121.214	0.190342	0.889571	0.232092	0.287853	0.0542116	0.17334
0.04	610234/Mianhui725	170.382	36.6981	9.11667	0.807699	29.6888	127.057	172.24	34.1307	10.6623	0.709126	27.514	121.214	177.993	40.7195	9.64935	0.842219	28.3699	133.899	172.24	34.1307	9.64935	0.709126	27.514	121.214	-0.010789	0.0752217	-0.0552041	0.139006	0.0790451	0.0481974
0.06	610234/9311K	159.45	46.1842	12.25	0.838268	24.8392	135.875	172.24	34.1307	10.6623	0.709126	27.514	121.214	158.615	41.7073	11.4231	0.900137	26.6607	132.957	158.615	34.1307	10.6623	0.709126	26.6607	121.214	0.0052648	0.353156	0.148904	0.182114	-0.0683196	0.120947
0.06	9311K/610234	153.09	54.8278	15.1111	0.859956	26.911	139.172	158.615	41.7073	11.4231	0.900137	26.6607	132.957	172.24	34.1307	10.6623	0.709126	27.514	121.214	158.615	34.1307	10.6623	0.709126	26.6607	121.214	-0.0348349	0.606406	0.417242	0.212699	0.00938734	0.148149
0.06	W1390/Liaoxing1	181.455	25.7144	6.61111	0.850329	25.1513	129.056	231.027	29.601	6.47727	0.815692	24.9439	127.885	202.388	38.5526	10.6167	0.692205	27.7398	144.79	202.388	29.601	6.47727	0.692205	24.9439	127.885	-0.103429	-0.131297	0.0206628	0.228435	0.00831715	0.00915199
0.06	Liaoxing1/W1390	248.467	25.2332	5.5	0.823076	22.39	125.3	202.388	38.5526	10.6167	0.692205	27.7398	144.79	231.027	29.601	6.47727	0.815692	24.9439	127.885	202.388	29.601	6.47727	0.692205	24.9439	127.885	0.227675	-0.147555	-0.150877	0.189064	-0.102385	-0.0202146
0.08	R465/Mianhui725	169.247	45.3581	11.7222	0.878061	25.7401	132.43	216.749	49.5188	11.2413	0.827005	24.8424	133.205	177.993	40.7195	9.64935	0.842219	28.3699	133.899	177.993	40.7195	9.64935	0.827005	24.8424	133.205	-0.0491371	0.113916	0.21482	0.0617354	0.0361368	-0.00581553
0.08	Mianhui725/R465	187.475	50.0523	11.2222	0.868287	27.026	143.86	177.993	40.7195	9.64935	0.842219	28.3699	133.899	216.749	49.5188	11.2413	0.827005	24.8424	133.205	177.993	40.7195	9.64935	0.827005	24.8424	133.205	0.0532752	0.229195	0.163003	0.0499172	0.0878994	0.0799947
0.08	W1392/Liaoxing1	217.713	32.2603	7.91667	0.796451	23.2815	124.381	194.92	27.8532	6.88889	0.793611	25.8729	121.464	202.388	38.5526	10.6167	0.692205	27.7398	144.79	194.92	27.8532	6.88889	0.692205	25.8729	121.464	0.116936	0.158229	0.149194	0.1506	-0.100161	0.0240126
0.08	Liaoxing1/W1392	219.824	40.1721	9.60606	0.818838	24.2266	132.37	202.388	38.5526	10.6167	0.692205	27.7398	144.79	194.92	27.8532	6.88889	0.793611	25.8729	121.464	194.92	27.8532	6.88889	0.692205	25.8729	121.464	0.127764	0.442282	0.394428	0.18294	-0.0636307	0.0897864
0.1	Mianhui725/9311K	143.117	17.0757	5.83333	0.680276	29.1277	137.633	177.993	40.7195	9.64935	0.842219	28.3699	133.899	158.615	41.7073	11.4231	0.900137	26.6607	132.957	158.615	40.7195	9.64935	0.842219	26.6607	132.957	-0.097711	-0.58065	-0.395469	-0.192282	0.0925351	0.0351686
0.1	9311K/Mianhui725	158.514	55.764	13.7778	0.880834	28.6544	148.595	158.615	41.7073	11.4231	0.900137	26.6607	132.957	177.993	40.7195	9.64935	0.842219	28.3699	133.899	158.615	40.7195	9.64935	0.842219	26.6607	132.957	-0.000635826	0.369465	0.427845	0.0458487	0.0747797	0.117615
0.1	W1383/W1392	308.854	22.138	5.16667	0.691761	23.1138	135.422	224.592	13.8812	4.88889	0.663073	18.3096	128.194	194.92	27.8532	6.88889	0.793611	25.8729	121.464	194.92	13.8812	4.88889	0.663073	18.3096	121.464	0.584517	0.594816	0.0568182	0.0432651	0.262388	0.114918
0.1	Liaoxing1/Wuyunjing8	162.111	31.9354	9.94444	0.794376	25.4272	112.25	202.388	38.5526	10.6167	0.692205	27.7398	144.79	97.4562	15.9139	9.06944	0.701265	24.4498	89.2056	97.4562	15.9139	9.06944	0.692205	24.4498	89.2056	0.663422	1.00676	0.0964778	0.147601	0.0399788	0.258331
0.1	Wuyunjing8/Liaoxing1	173	28.8939	12.5	0.77806	24.276	100.55	97.4562	15.9139	9.06944	0.701265	24.4498	89.2056	202.388	38.5526	10.6167	0.692205	27.7398	144.79	97.4562	15.9139	9.06944	0.692205	24.4498	89.2056	0.775156	0.815641	0.378254	0.124031	-0.00710641	0.127172
0.12	R465/610234	209.955	51.3882	11.3	0.840465	26.1887	142.258	216.749	49.5188	11.2413	0.827005	24.8424	133.205	172.24	34.1307	10.6623	0.709126	27.514	121.214	172.24	34.1307	10.6623	0.709126	24.8424	121.214	0.21897	0.505629	0.0598051	0.185212	0.0541935	0.173609
0.12	610234/R465	210.372	58.0551	11.3611	0.893619	27.3287	131.787	172.24	34.1307	10.6623	0.709126	27.514	121.214	216.749	49.5188	11.2413	0.827005	24.8424	133.205	172.24	34.1307	10.6623	0.709126	24.8424	121.214	0.221391	0.700962	0.0655366	0.26017	0.100085	0.087226
0.12	9311K/Qianlijing	247.918	66.8732	13.5	0.831975	25.5466	139.925	158.615	41.7073	11.4231	0.900137	26.6607	132.957	403.337	27.9485	4.92698	0.723813	19.3791	118.72	158.615	27.9485	4.92698	0.723813	19.3791	118.72	0.563013	1.39273	1.74001	0.149433	0.318251	0.178618
0.12	Qianlijing/9311K	310.507	61.1699	8.45833	0.908597	24.329	136.9	403.337	27.9485	4.92698	0.723813	19.3791	118.72	158.615	41.7073	11.4231	0.900137	26.6607	132.957	158.615	27.9485	4.92698	0.723813	19.3791	118.72	0.957612	1.18866	0.716736	0.255292	0.255421	0.153138
0.12	W1383/W1390	265.036	47.9585	8.22222	0.867454	24.9508	133.644	224.592	13.8812	4.88889	0.663073	18.3096	128.194	231.027	29.601	6.47727	0.815692	24.9439	127.885	224.592	13.8812	4.88889	0.663073	18.3096	127.885	0.180079	2.45492	0.681818	0.308233	0.362718	0.0450349
0.12	W1390/W1383	270.245	49.7873	7.75	0.902611	26.1578	140.092	231.027	29.601	6.47727	0.815692	24.9439	127.885	224.592	13.8812	4.88889	0.663073	18.3096	128.194	224.592	13.8812	4.88889	0.663073	18.3096	127.885	0.203271	2.58666	0.585227	0.361254	0.428639	0.095449
0.12	Liaoxing1/Balilla	173.395	31.4512	9.33333	0.787108	24.6642	112.21	202.388	38.5526	10.6167	0.692205	27.7398	144.79	133.553	20.08	9.59524	0.699422	23.7528	93.2663	133.553	20.08	9.59524	0.692205	23.7528	93.2663	0.298325	0.566298	-0.0272953	0.137102	0.0383705	0.203118
0.12	Balilla/Liaoxing1	188.877	32.1578	9.36111	0.789935	23.4753	111.797	133.553	20.08	9.59524	0.699422	23.7528	93.2663	202.388	38.5526	10.6167	0.692205	27.7398	144.79	133.553	20.08	9.59524	0.692205	23.7528	93.2663	0.414246	0.601485	-0.0244003	0.141186	-0.0116799	0.198688
0.13	W1384/W1392	230.013	26.4579	7.69444	0.634977	24.2329	142.661	286.941	37.7954	8.22222	0.754746	21.4445	137.918	194.92	27.8532	6.88889	0.793611	25.8729	121.464	194.92	27.8532	6.88889	0.754746	21.4445	121.464	0.180037	-0.0500919	0.116935	-0.158689	0.13003	0.174515
0.13	W1392/W1384	254.677	24.7423	5.33333	0.772107	24.2708	139.717	194.92	27.8532	6.88889	0.793611	25.8729	121.464	286.941	37.7954	8.22222	0.754746	21.4445	137.918	194.92	27.8532	6.88889	0.754746	21.4445	121.464	0.306571	-0.111686	-0.225806	0.0230022	0.131798	0.150273
0.15	W1384/W1390	240.511	41.9666	9.88889	0.798484	24.1509	136.839	286.941	37.7954	8.22222	0.754746	21.4445	137.918	231.027	29.601	6.47727	0.815692	24.9439	127.885	231.027	29.601	6.47727	0.754746	21.4445	127.885	0.04105	0.417744	0.526706	0.0579495	0.126205	0.0700139
0.15	W1390/W1384	265.429	39.6366	7.44444	0.799573	25.0871	137.711	231.027	29.601	6.47727	0.815692	24.9439	127.885	286.941	37.7954	8.22222	0.754746	21.4445	137.918	231.027	29.601	6.47727	0.754746	21.4445	127.885	0.148906	0.339029	0.149318	0.0593929	0.169863	0.0768342
0.16	W1390/Wuyunjing8	144.841	29.3906	8.81667	0.79264	26.5796	122.314	231.027	29.601	6.47727	0.815692	24.9439	127.885	97.4562	15.9139	9.06944	0.701265	24.4498	89.2056	97.4562	15.9139	6.47727	0.701265	24.4498	89.2056	0.486217	0.846851	0.36117	0.1303	0.0871118	0.37115
0.16	Wuyunjing8/W1390	123.462	21.2927	8.05556	0.760682	26.2601	107.1	97.4562	15.9139	9.06944	0.701265	24.4498	89.2056	231.027	29.601	6.47727	0.815692	24.9439	127.885	97.4562	15.9139	6.47727	0.701265	24.4498	89.2056	0.26685	0.337996	0.243665	0.0847277	0.0740442	0.200598
0.18	R465/9311K	187.364	51.5084	11	0.935468	26.716	150	216.749	49.5188	11.2413	0.827005	24.8424	133.205	158.615	41.7073	11.4231	0.900137	26.6607	132.957	158.615	41.7073	11.2413	0.827005	24.8424	132.957	0.181247	0.234998	-0.0214629	0.131151	0.0754207	0.128181
0.18	610234/Qianlijing	—	—	—	—	—	142.5	172.24	34.1307	10.6623	0.709126	27.514	121.214	403.337	27.9485	4.92698	0.723813	19.3791	118.72	172.24	27.9485	4.92698	0.709126	19.3791	118.72	—	—	—	—	—	0.200308
0.18	9311K/R465	201.356	69.3528	13.6667	0.861832	26.6627	147.167	158.615	41.7073	11.4231	0.900137	26.6607	132.957	216.749	49.5188	11.2413	0.827005	24.8424	133.205	158.615	41.7073	11.2413	0.827005	24.8424	132.957	0.269464	0.662845	0.215758	0.0421117	0.0732738	0.106871
0.18	Qianlijing/610234	325.642	67.5609	9.33333	0.836437	26.6531	139.872	403.337	27.9485	4.92698	0.723813	19.3791	118.72	172.24	34.1307	10.6623	0.709126	27.514	121.214	172.24	27.9485	4.92698	0.709126	19.3791	118.72	0.890629	1.41733	0.89433	0.179533	0.37535	0.178174
0.18	W1392/Wuyunjing8	162.914	24.4606	5.88889	0.898016	27.7491	110.511	194.92	27.8532	6.88889	0.793611	25.8729	121.464	97.4562	15.9139	9.06944	0.701265	24.4498	89.2056	97.4562	15.9139	6.88889	0.701265	24.4498	89.2056	0.671662	0.537059	-0.145161	0.280565	0.134945	0.238837
0.18	W1390/Balilla	218.149	36.0482	11.25	0.614353	23.7118	121.4	231.027	29.601	6.47727	0.815692	24.9439	127.885	133.553	20.08	9.59524	0.699422	23.7528	93.2663	133.553	20.08	6.47727	0.699422	23.7528	93.2663	0.633424	0.79523	0.736842	-0.121628	-0.00172664	0.301649
0.18	Wuyunjing8/W1392	157.308	33.2943	9.57778	0.791944	27.5429	114.468	97.4562	15.9139	9.06944	0.701265	24.4498	89.2056	194.92	27.8532	6.88889	0.793611	25.8729	121.464	97.4562	15.9139	6.88889	0.701265	24.4498	89.2056	0.614139	1.09215	0.390323	0.129308	0.126511	0.283191
0.18	Balilla/W1390	247.97	31.9651	6.86111	0.727655	25.2906	118.747	133.553	20.08	9.59524	0.699422	23.7528	93.2663	231.027	29.601	6.47727	0.815692	24.9439	127.885	133.553	20.08	6.47727	0.699422	23.7528	93.2663	0.856715	0.591889	0.0592593	0.0403652	0.0647452	0.273206
0.2	W1392/Balilla	213.762	24.2954	8.66667	0.556415	24.1883	120.167	194.92	27.8532	6.88889	0.793611	25.8729	121.464	133.553	20.08	9.59524	0.699422	23.7528	93.2663	133.553	20.08	6.88889	0.699422	23.7528	93.2663	0.600578	0.209931	0.258065	-0.204465	0.0183377	0.288425
0.2	Balilla/W1392	242.76	33.1653	7.70833	0.707433	25.2515	117.235	133.553	20.08	9.59524	0.699422	23.7528	93.2663	194.92	27.8532	6.88889	0.793611	25.8729	121.464	133.553	20.08	6.88889	0.699422	23.7528	93.2663	0.817708	0.651661	0.118952	0.0114538	0.0630956	0.256987
0.21	W1384/Liaoxing1	281.163	33.1309	6.72222	0.771281	22.6335	138.281	286.941	37.7954	8.22222	0.754746	21.4445	137.918	202.388	38.5526	10.6167	0.692205	27.7398	144.79	202.388	37.7954	8.22222	0.692205	21.4445	137.918	0.389228	-0.123415	-0.182432	0.114237	0.0554476	0.00262635
0.21	Liaoxing1/W1384	257.005	37.5711	8	0.787875	23.4736	138.011	202.388	38.5526	10.6167	0.692205	27.7398	144.79	286.941	37.7954	8.22222	0.754746	21.4445	137.918	202.388	37.7954	8.22222	0.692205	21.4445	137.918	0.269866	-0.00593397	-0.027027	0.13821	0.0946198	0.000675003
0.22	Mianhui725/Qianlijing	279.186	54.5102	8.97222	0.805315	25.818	139.857	177.993	40.7195	9.64935	0.842219	28.3699	133.899	403.337	27.9485	4.92698	0.723813	19.3791	118.72	177.993	27.9485	4.92698	0.723813	19.3791	118.72	0.568527	0.950378	0.821037	0.112601	0.332257	0.178043
0.22	Qianlijing/Mianhui725	258.438	58.7872	8.77778	0.923009	28.2681	142.476	403.337	27.9485	4.92698	0.723813	19.3791	118.72	177.993	40.7195	9.64935	0.842219	28.3699	133.899	177.993	27.9485	4.92698	0.723813	19.3791	118.72	0.451956	1.10341	0.781572	0.275203	0.458687	0.200102
0.28	W1383/Wuyunjing8	182.503	33.2024	10.9444	0.715583	24.6339	119.142	224.592	13.8812	4.88889	0.663073	18.3096	128.194	97.4562	15.9139	9.06944	0.701265	24.4498	89.2056	97.4562	13.8812	4.88889	0.663073	18.3096	89.2056	0.872664	1.3919	1.23864	0.0791912	0.345406	0.335586
0.28	Wuyunjing8/W1383	203.943	39.208	9.72222	0.818675	24.7611	116.422	97.4562	15.9139	9.06944	0.701265	24.4498	89.2056	224.592	13.8812	4.88889	0.663073	18.3096	128.194	97.4562	13.8812	4.88889	0.663073	18.3096	89.2056	1.09266	1.82453	0.988636	0.234668	0.352353	0.305101
0.3	R465/Qianlijing	298.581	60.0328	9.44444	0.847795	25.7051	143.124	216.749	49.5188	11.2413	0.827005	24.8424	133.205	403.337	27.9485	4.92698	0.723813	19.3791	118.72	216.749	27.9485	4.92698	0.723813	19.3791	118.72	0.377543	1.14797	0.916881	0.171289	0.326428	0.205568
0.3	Qianlijing/R465	306.721	66.5486	9.33333	0.866889	26.794	140.917	403.337	27.9485	4.92698	0.723813	19.3791	118.72	216.749	49.5188	11.2413	0.827005	24.8424	133.205	216.749	27.9485	4.92698	0.723813	19.3791	118.72	0.415097	1.38111	0.89433	0.197669	0.38262	0.186971
0.3	W1383/Balilla	270.785	42.7983	8.08333	0.826788	23.3134	133.669	224.592	13.8812	4.88889	0.663073	18.3096	128.194	133.553	20.08	9.59524	0.699422	23.7528	93.2663	133.553	13.8812	4.88889	0.663073	18.3096	93.2663	1.02755	2.08318	0.653409	0.246903	0.273285	0.433202
0.3	Balilla/W1383	246.461	27.9396	6.5	0.712191	24.6723	134.422	133.553	20.08	9.59524	0.699422	23.7528	93.2663	224.592	13.8812	4.88889	0.663073	18.3096	128.194	133.553	13.8812	4.88889	0.663073	18.3096	93.2663	0.845419	1.01276	0.329545	0.0740768	0.347507	0.441273
0.31	W1384/Wuyunjing8	186.506	29.47	8.27778	0.808032	24.39	121.299	286.941	37.7954	8.22222	0.754746	21.4445	137.918	97.4562	15.9139	9.06944	0.701265	24.4498	89.2056	97.4562	15.9139	8.22222	0.701265	21.4445	89.2056	0.91374	0.851839	0.00675676	0.152249	0.137357	0.359767
0.31	Wuyunjing8/W1384	158.395	36.2558	11.3333	0.806084	25.519	118.577	97.4562	15.9139	9.06944	0.701265	24.4498	89.2056	286.941	37.7954	8.22222	0.754746	21.4445	137.918	97.4562	15.9139	8.22222	0.701265	21.4445	89.2056	0.62529	1.27825	0.378378	0.149471	0.190003	0.329254
0.33	W1384/Balilla	245.435	31.5109	7.58333	0.68009	24.7382	130.347	286.941	37.7954	8.22222	0.754746	21.4445	137.918	133.553	20.08	9.59524	0.699422	23.7528	93.2663	133.553	20.08	8.22222	0.699422	21.4445	93.2663	0.837735	0.569272	-0.0777027	-0.0276405	0.153592	0.397581
0.33	Balilla/W1384	254.728	49.991	12	0.66711	24.0892	126.36	133.553	20.08	9.59524	0.699422	23.7528	93.2663	286.941	37.7954	8.22222	0.754746	21.4445	137.918	133.553	20.08	8.22222	0.699422	21.4445	93.2663	0.907318	1.4896	0.459459	-0.0461988	0.12333	0.354832
0.37	Qianlijing/W1384	386.4	47.3554	6.73333	0.766835	23.6823	150.38	403.337	27.9485	4.92698	0.723813	19.3791	118.72	286.941	37.7954	8.22222	0.754746	21.4445	137.918	286.941	27.9485	4.92698	0.723813	19.3791	118.72	0.34662	0.694378	0.366624	0.0594385	0.222051	0.266683
0.37	W1384/Qianlijing	375.266	53.1867	9.77778	0.585325	24.2773	151.077	286.941	37.7954	8.22222	0.754746	21.4445	137.918	403.337	27.9485	4.92698	0.723813	19.3791	118.72	286.941	27.9485	4.92698	0.723813	19.3791	118.72	0.307817	0.903024	0.984536	-0.191331	0.252755	0.272558
0.4	Qianlijing/W1383	365.606	47.2589	6.51111	0.808934	22.1618	153.859	403.337	27.9485	4.92698	0.723813	19.3791	118.72	224.592	13.8812	4.88889	0.663073	18.3096	128.194	224.592	13.8812	4.88889	0.663073	18.3096	118.72	0.627871	2.40452	0.331818	0.219977	0.210393	0.295985
0.4	W1383/Qianlijing	381.102	50.8402	6.77778	0.875719	21.9802	170.573	224.592	13.8812	4.88889	0.663073	18.3096	128.194	403.337	27.9485	4.92698	0.723813	19.3791	118.72	224.592	13.8812	4.88889	0.663073	18.3096	118.72	0.696868	2.66252	0.386364	0.320698	0.200475	0.436776
0.49	9311K/W1384	184.742	44.1095	15.0556	0.653481	24.7228	159.591	158.615	41.7073	11.4231	0.900137	26.6607	132.957	286.941	37.7954	8.22222	0.754746	21.4445	137.918	158.615	37.7954	8.22222	0.754746	21.4445	132.957	0.164718	0.167059	0.831081	-0.134171	0.152874	0.200313
0.49	W1384/9311K	218.002	43.4148	12.6944	0.608188	26.2599	149.28	286.941	37.7954	8.22222	0.754746	21.4445	137.918	158.615	41.7073	11.4231	0.900137	26.6607	132.957	158.615	37.7954	8.22222	0.754746	21.4445	132.957	0.374411	0.148679	0.543919	-0.194183	0.224555	0.122766
0.5	W1392/Qianlijing	397.887	77.5524	9.16667	0.839765	24.2758	153	194.92	27.8532	6.88889	0.793611	25.8729	121.464	403.337	27.9485	4.92698	0.723813	19.3791	118.72	194.92	27.8532	4.92698	0.723813	19.3791	118.72	1.04128	1.78433	0.860503	0.160195	0.252678	0.288752
0.52	9311K/W1383	185.038	26.9561	10.7778	0.530732	25.608	153.593	158.615	41.7073	11.4231	0.900137	26.6607	132.957	224.592	13.8812	4.88889	0.663073	18.3096	128.194	158.615	13.8812	4.88889	0.663073	18.3096	128.194	0.166585	0.941909	1.20455	-0.199587	0.39861	0.198129
0.52	Qianlijing/W1390	317.569	45.7516	6.33333	0.87755	25.9262	153.472	403.337	27.9485	4.92698	0.723813	19.3791	118.72	231.027	29.601	6.47727	0.815692	24.9439	127.885	231.027	27.9485	4.92698	0.723813	19.3791	118.72	0.374596	0.636993	0.285438	0.212399	0.337838	0.292729
0.52	W1383/9311K	210.348	23.3471	9.33333	0.493808	22.0487	153.478	224.592	13.8812	4.88889	0.663073	18.3096	128.194	158.615	41.7073	11.4231	0.900137	26.6607	132.957	158.615	13.8812	4.88889	0.663073	18.3096	128.194	0.326156	0.681922	0.909091	-0.255273	0.204217	0.19723
0.55	610234/W1384	247.922	31.6108	10.7917	0.460785	25.219	154.706	172.24	34.1307	10.6623	0.709126	27.514	121.214	286.941	37.7954	8.22222	0.754746	21.4445	137.918	172.24	34.1307	8.22222	0.709126	21.4445	121.214	0.439397	-0.0738319	0.3125	-0.350207	0.176013	0.276296
0.55	W1384/610234	219.103	38.0461	11.8611	0.564693	26.7439	156.915	286.941	37.7954	8.22222	0.754746	21.4445	137.918	172.24	34.1307	10.6623	0.709126	27.514	121.214	172.24	34.1307	8.22222	0.709126	21.4445	121.214	0.272079	0.114717	0.442568	-0.203678	0.247122	0.294525
0.58	Qianlijing/Liaoxing1	349.854	28.7738	5.68333	0.56936	25.33	118.345	403.337	27.9485	4.92698	0.723813	19.3791	118.72	202.388	38.5526	10.6167	0.692205	27.7398	144.79	202.388	27.9485	4.92698	0.692205	19.3791	118.72	0.728632	0.0295294	0.153512	-0.177469	0.307077	-0.00315469
0.58	W1383/610234	223.077	38.6041	10.5	0.847201	19.082	147.65	224.592	13.8812	4.88889	0.663073	18.3096	128.194	172.24	34.1307	10.6623	0.709126	27.514	121.214	172.24	13.8812	4.88889	0.663073	18.3096	121.214	0.295154	1.78103	1.14773	0.277688	0.0421849	0.218089
0.58	Liaoxing1/Qianlijing	240.979	20.4463	6.25	0.595178	23.1755	119.969	202.388	38.5526	10.6167	0.692205	27.7398	144.79	403.337	27.9485	4.92698	0.723813	19.3791	118.72	202.388	27.9485	4.92698	0.692205	19.3791	118.72	0.190679	-0.268429	0.268524	-0.140172	0.195899	0.0105283
0.59	Mianhui725/W1384	217.366	33.3635	8.91667	0.638258	26.7722	148.425	177.993	40.7195	9.64935	0.842219	28.3699	133.899	286.941	37.7954	8.22222	0.754746	21.4445	137.918	177.993	37.7954	8.22222	0.754746	21.4445	133.899	0.22121	-0.117262	0.0844595	-0.154341	0.248441	0.108485
0.59	W1384/Mianhui725	282.048	39.387	8.83333	0.637289	25.2751	153.118	286.941	37.7954	8.22222	0.754746	21.4445	137.918	177.993	40.7195	9.64935	0.842219	28.3699	133.899	177.993	37.7954	8.22222	0.754746	21.4445	133.899	0.584605	0.0421096	0.0743243	-0.155625	0.17863	0.143534
0.62	9311K/W1392	206.821	32.2528	11.4444	0.537795	25.7247	155.289	158.615	41.7073	11.4231	0.900137	26.6607	132.957	194.92	27.8532	6.88889	0.793611	25.8729	121.464	158.615	27.8532	6.88889	0.793611	25.8729	121.464	0.303916	0.157957	0.66129	-0.322345	-0.005731	0.278478
0.62	W1383/Mianhui725	224.488	35.7311	9	0.603483	26.9664	149.982	224.592	13.8812	4.88889	0.663073	18.3096	128.194	177.993	40.7195	9.64935	0.842219	28.3699	133.899	177.993	13.8812	4.88889	0.663073	18.3096	128.194	0.261221	1.57406	0.840909	-0.0898693	0.472803	0.169958
0.62	W1392/9311K	226.075	41.7697	13.3333	0.540848	25.9946	158.333	194.92	27.8532	6.88889	0.793611	25.8729	121.464	158.615	41.7073	11.4231	0.900137	26.6607	132.957	158.615	27.8532	6.88889	0.793611	25.8729	121.464	0.425304	0.49964	0.935484	-0.318497	0.00470032	0.303542
0.64	9311K/W1390	197.343	39.0106	15.2778	0.466347	27.211	150.954	158.615	41.7073	11.4231	0.900137	26.6607	132.957	231.027	29.601	6.47727	0.815692	24.9439	127.885	158.615	29.601	6.47727	0.815692	24.9439	127.885	0.244165	0.317882	1.35867	-0.42828	0.0908892	0.180389
0.64	W1390/9311K	189.462	58.3579	13	0.889106	26.6645	131.35	231.027	29.601	6.47727	0.815692	24.9439	127.885	158.615	41.7073	11.4231	0.900137	26.6607	132.957	158.615	29.601	6.47727	0.815692	24.9439	127.885	0.194473	0.971486	1.00702	0.0900025	0.06898	0.0270934
0.67	R465/W1384	211.194	29.4929	9.77778	0.568823	25.8506	160.151	216.749	49.5188	11.2413	0.827005	24.8424	133.205	286.941	37.7954	8.22222	0.754746	21.4445	137.918	216.749	37.7954	8.22222	0.754746	21.4445	133.205	-0.0256276	-0.21967	0.189189	-0.246339	0.205468	0.202294
0.67	W1384/R465	291.471	38.1571	9.33333	0.570364	25.6066	160.075	286.941	37.7954	8.22222	0.754746	21.4445	137.918	216.749	49.5188	11.2413	0.827005	24.8424	133.205	216.749	37.7954	8.22222	0.754746	21.4445	133.205	0.344738	0.00957072	0.135135	-0.244297	0.194086	0.201722
0.68	610234/W1392	239.884	35.4436	11.7778	0.476199	26.4749	148.635	172.24	34.1307	10.6623	0.709126	27.514	121.214	194.92	27.8532	6.88889	0.793611	25.8729	121.464	172.24	27.8532	6.88889	0.709126	25.8729	121.214	0.392729	0.272518	0.709677	-0.32847	0.0232654	0.226213
0.68	Qianlijing/Wuyunjing8	291.615	37.7751	7.08333	0.784499	23.3104	144.987	403.337	27.9485	4.92698	0.723813	19.3791	118.72	97.4562	15.9139	9.06944	0.701265	24.4498	89.2056	97.4562	15.9139	4.92698	0.701265	19.3791	89.2056	1.99226	1.37372	0.437661	0.11869	0.202859	0.625313
0.68	W1392/610234	239.622	35.208	11.7222	0.475739	26.4624	147.647	194.92	27.8532	6.88889	0.793611	25.8729	121.464	172.24	34.1307	10.6623	0.709126	27.514	121.214	172.24	27.8532	6.88889	0.709126	25.8729	121.214	0.391209	0.264056	0.701613	-0.329118	0.0227823	0.218066
0.68	Wuyunjing8/Qianlijing	285.662	40.3364	7.33333	0.802592	24.1395	144.583	97.4562	15.9139	9.06944	0.701265	24.4498	89.2056	403.337	27.9485	4.92698	0.723813	19.3791	118.72	97.4562	15.9139	4.92698	0.701265	19.3791	89.2056	1.93119	1.53467	0.488402	0.144492	0.245643	0.620788
0.7	R465/W1383	241.04	36.5225	10.1944	0.607439	26.6568	151.772	216.749	49.5188	11.2413	0.827005	24.8424	133.205	224.592	13.8812	4.88889	0.663073	18.3096	128.194	216.749	13.8812	4.88889	0.663073	18.3096	128.194	0.112068	1.63107	1.08523	-0.0839037	0.455893	0.183926
0.7	610234/W1390	221.577	21.7098	9.66667	0.397935	25.6633	155.929	172.24	34.1307	10.6623	0.709126	27.514	121.214	231.027	29.601	6.47727	0.815692	24.9439	127.885	172.24	29.601	6.47727	0.709126	24.9439	121.214	0.286441	-0.266585	0.492398	-0.438838	0.0288432	0.286391
0.7	9311K/Liaoxing1	207.23	47.3734	12.6667	0.651656	25.4663	135.167	158.615	41.7073	11.4231	0.900137	26.6607	132.957	202.388	38.5526	10.6167	0.692205	27.7398	144.79	158.615	38.5526	10.6167	0.692205	26.6607	132.957	0.306498	0.228798	0.193093	-0.0585808	-0.0447987	0.0166163
0.7	Qianlijing/Balilla	284.708	49.1921	9.03175	0.748608	25.8302	124.586	403.337	27.9485	4.92698	0.723813	19.3791	118.72	133.553	20.08	9.59524	0.699422	23.7528	93.2663	133.553	20.08	4.92698	0.699422	19.3791	93.2663	1.1318	1.44981	0.833119	0.0703236	0.332887	0.335806
0.7	W1390/610234	195.418	23.4398	10.7778	0.420202	26.1451	167.447	231.027	29.601	6.47727	0.815692	24.9439	127.885	172.24	34.1307	10.6623	0.709126	27.514	121.214	172.24	29.601	6.47727	0.709126	24.9439	121.214	0.13457	-0.20814	0.663938	-0.407437	0.0481577	0.381409
0.7	Liaoxing1/9311K	200.233	54.9498	16.6667	0.627806	26.004	141.844	202.388	38.5526	10.6167	0.692205	27.7398	144.79	158.615	41.7073	11.4231	0.900137	26.6607	132.957	158.615	38.5526	10.6167	0.692205	26.6607	132.957	0.262384	0.425318	0.569859	-0.0930357	-0.0246317	0.0668412
0.7	Balilla/Qianlijing	—	—	—	—	—	117.3	133.553	20.08	9.59524	0.699422	23.7528	93.2663	403.337	27.9485	4.92698	0.723813	19.3791	118.72	133.553	20.08	4.92698	0.699422	19.3791	93.2663	—	—	—	—	—	0.257689
0.72	Mianhui725/W1392	216.41	32.4937	9.52778	0.615137	26.4528	153.275	177.993	40.7195	9.64935	0.842219	28.3699	133.899	194.92	27.8532	6.88889	0.793611	25.8729	121.464	177.993	27.8532	6.88889	0.793611	25.8729	121.464	0.215835	0.166607	0.383065	-0.224888	0.0224108	0.261898
0.72	W1392/Mianhui725	218.004	44.2192	10.5556	0.714973	27.1962	159.489	194.92	27.8532	6.88889	0.793611	25.8729	121.464	177.993	40.7195	9.64935	0.842219	28.3699	133.899	177.993	27.8532	6.88889	0.793611	25.8729	121.464	0.224793	0.587585	0.532258	-0.0990889	0.0511442	0.313059
0.74	Mianhui725/W1390	216.826	34.9937	11.1111	0.540414	27.8642	155.186	177.993	40.7195	9.64935	0.842219	28.3699	133.899	231.027	29.601	6.47727	0.815692	24.9439	127.885	177.993	29.601	6.47727	0.815692	24.9439	127.885	0.218175	0.18218	0.7154	-0.337478	0.117077	0.213477
0.74	W1390/Mianhui725	209.998	30.2466	6.94444	0.731345	28.0447	164.187	231.027	29.601	6.47727	0.815692	24.9439	127.885	177.993	40.7195	9.64935	0.842219	28.3699	133.899	177.993	29.601	6.47727	0.815692	24.9439	127.885	0.179815	0.0218125	0.0721248	-0.103406	0.124313	0.283863
0.76	610234/Liaoxing1	232.659	40.9696	9.33333	0.689031	27.4529	139.151	172.24	34.1307	10.6623	0.709126	27.514	121.214	202.388	38.5526	10.6167	0.692205	27.7398	144.79	172.24	34.1307	10.6167	0.692205	27.514	121.214	0.350784	0.200373	-0.120879	-0.00458667	-0.00222029	0.147975
0.76	Liaoxing1/610234	208.407	41.3577	12.2778	0.604987	26.0014	137.569	202.388	38.5526	10.6167	0.692205	27.7398	144.79	172.24	34.1307	10.6623	0.709126	27.514	121.214	172.24	34.1307	10.6167	0.692205	27.514	121.214	0.209983	0.211744	0.156463	-0.126	-0.0549743	0.13492
0.8	R465/W1392	248.31	34.2121	9.44444	0.543418	26.9706	165.79	216.749	49.5188	11.2413	0.827005	24.8424	133.205	194.92	27.8532	6.88889	0.793611	25.8729	121.464	194.92	27.8532	6.88889	0.793611	24.8424	121.464	0.273908	0.228301	0.370968	-0.315259	0.0856686	0.364936
0.8	Mianhui725/Liaoxing1	198.556	36.1273	9	0.734679	28.1831	136.542	177.993	40.7195	9.64935	0.842219	28.3699	133.899	202.388	38.5526	10.6167	0.692205	27.7398	144.79	177.993	38.5526	9.64935	0.692205	27.7398	133.899	0.115529	-0.0629112	-0.0672948	0.06136	0.0159834	0.0197367
0.8	9311K/Wuyunjing8	150.915	30.7706	13.25	0.647332	25.7118	147.442	158.615	41.7073	11.4231	0.900137	26.6607	132.957	97.4562	15.9139	9.06944	0.701265	24.4498	89.2056	97.4562	15.9139	9.06944	0.701265	24.4498	89.2056	0.548544	0.933567	0.460949	-0.0769083	0.0516195	0.652831
0.8	W1392/R465	241.408	37.4277	9.47222	0.612832	26.5352	171.892	194.92	27.8532	6.88889	0.793611	25.8729	121.464	216.749	49.5188	11.2413	0.827005	24.8424	133.205	194.92	27.8532	6.88889	0.793611	24.8424	121.464	0.2385	0.343752	0.375	-0.227793	0.0681426	0.415167
0.8	Liaoxing1/Mianhui725	203.496	39.867	11.7917	0.647931	27.9905	137.856	202.388	38.5526	10.6167	0.692205	27.7398	144.79	177.993	40.7195	9.64935	0.842219	28.3699	133.899	177.993	38.5526	9.64935	0.692205	27.7398	133.899	0.143284	0.0340916	0.222017	-0.0639611	0.00903937	0.0295492
0.8	Wuyunjing8/9311K	142.241	22.98	10.4444	0.5919	25.6763	139.125	97.4562	15.9139	9.06944	0.701265	24.4498	89.2056	158.615	41.7073	11.4231	0.900137	26.6607	132.957	97.4562	15.9139	9.06944	0.701265	24.4498	89.2056	0.459539	0.444023	0.151608	-0.155955	0.0501652	0.559605
0.82	R465/W1390	258.422	44.3686	13.4167	0.480915	26.9965	165.192	216.749	49.5188	11.2413	0.827005	24.8424	133.205	231.027	29.601	6.47727	0.815692	24.9439	127.885	216.749	29.601	6.47727	0.815692	24.8424	127.885	0.192263	0.49889	1.07135	-0.410421	0.0867119	0.291719
0.82	9311K/Balilla	179.739	41.5949	12.3333	0.70217	26.5913	149.276	158.615	41.7073	11.4231	0.900137	26.6607	132.957	133.553	20.08	9.59524	0.699422	23.7528	93.2663	133.553	20.08	9.59524	0.699422	23.7528	93.2663	0.345827	1.07146	0.28536	0.00392876	0.119505	0.600539
0.82	W1390/R465	233.429	41.7863	14.6944	0.49854	27.3229	173.954	231.027	29.601	6.47727	0.815692	24.9439	127.885	216.749	49.5188	11.2413	0.827005	24.8424	133.205	216.749	29.601	6.47727	0.815692	24.8424	127.885	0.0769557	0.411654	1.26862	-0.388814	0.0998503	0.36024
0.82	Balilla/9311K	210.955	54.4537	13.2833	0.732486	26.6906	142.71	133.553	20.08	9.59524	0.699422	23.7528	93.2663	158.615	41.7073	11.4231	0.900137	26.6607	132.957	133.553	20.08	9.59524	0.699422	23.7528	93.2663	0.579562	1.71184	0.384367	0.0472724	0.123683	0.530135
0.86	610234/Wuyunjing8	179.883	31.1316	13.5	0.443283	25.2233	143.684	172.24	34.1307	10.6623	0.709126	27.514	121.214	97.4562	15.9139	9.06944	0.701265	24.4498	89.2056	97.4562	15.9139	9.06944	0.701265	24.4498	89.2056	0.845781	0.95625	0.488515	-0.367882	0.0316397	0.610712
0.86	Wuyunjing8/610234	157.225	29.8828	14.9167	0.503642	25.8402	143.597	97.4562	15.9139	9.06944	0.701265	24.4498	89.2056	172.24	34.1307	10.6623	0.709126	27.514	121.214	97.4562	15.9139	9.06944	0.701265	24.4498	89.2056	0.613284	0.877782	0.644717	-0.28181	0.0568717	0.609734
0.88	R465/Liaoxing1	226.14	38.5634	11.8333	0.524144	27.5328	141.817	216.749	49.5188	11.2413	0.827005	24.8424	133.205	202.388	38.5526	10.6167	0.692205	27.7398	144.79	202.388	38.5526	10.6167	0.692205	24.8424	133.205	0.117358	0.000277785	0.1146	-0.242791	0.108301	0.0646525
0.88	610234/Balilla	215.956	19.5018	12.0139	0.265004	28.375	128.367	172.24	34.1307	10.6623	0.709126	27.514	121.214	133.553	20.08	9.59524	0.699422	23.7528	93.2663	133.553	20.08	9.59524	0.699422	23.7528	93.2663	0.617007	-0.0287935	0.252068	-0.62111	0.194597	0.376347
0.88	Liaoxing1/R465	223.366	34.7006	11.5556	0.491811	27.4038	141.15	202.388	38.5526	10.6167	0.692205	27.7398	144.79	216.749	49.5188	11.2413	0.827005	24.8424	133.205	202.388	38.5526	10.6167	0.692205	24.8424	133.205	0.10365	-0.0999153	0.0884354	-0.289502	0.103106	0.0596503
0.88	Balilla/610234	219.442	25.196	11	0.413745	27.5825	122.272	133.553	20.08	9.59524	0.699422	23.7528	93.2663	172.24	34.1307	10.6623	0.709126	27.514	121.214	133.553	20.08	9.59524	0.699422	23.7528	93.2663	0.643107	0.254782	0.146402	-0.408448	0.161233	0.311001
0.9	Mianhui725/Wuyunjing8	168.846	21.9846	11	0.455522	26.1401	147.515	177.993	40.7195	9.64935	0.842219	28.3699	133.899	97.4562	15.9139	9.06944	0.701265	24.4498	89.2056	97.4562	15.9139	9.06944	0.701265	24.4498	89.2056	0.732528	0.381473	0.212864	-0.350428	0.0691361	0.653653
0.9	Wuyunjing8/Mianhui725	132.938	23.4076	11.6667	0.576468	26.5854	156.453	97.4562	15.9139	9.06944	0.701265	24.4498	89.2056	177.993	40.7195	9.64935	0.842219	28.3699	133.899	97.4562	15.9139	9.06944	0.701265	24.4498	89.2056	0.364076	0.47089	0.286371	-0.17796	0.0873504	0.753846
0.92	Mianhui725/Balilla	186.188	6.90967	16.8889	0.104019	26.7947	130.899	177.993	40.7195	9.64935	0.842219	28.3699	133.899	133.553	20.08	9.59524	0.699422	23.7528	93.2663	133.553	20.08	9.59524	0.699422	23.7528	93.2663	0.394109	-0.655892	0.760132	-0.851279	0.128066	0.403502
0.92	Balilla/Mianhui725	190.309	25.3967	15.7778	0.298996	27.3917	130.616	133.553	20.08	9.59524	0.699422	23.7528	93.2663	177.993	40.7195	9.64935	0.842219	28.3699	133.899	133.553	20.08	9.59524	0.699422	23.7528	93.2663	0.42497	0.264779	0.644334	-0.57251	0.153199	0.400467
0.98	R465/Wuyunjing8	166.58	24.8816	9.25	0.558943	27.3323	154.1	216.749	49.5188	11.2413	0.827005	24.8424	133.205	97.4562	15.9139	9.06944	0.701265	24.4498	89.2056	97.4562	15.9139	9.06944	0.701265	24.4498	89.2056	0.70928	0.563511	0.0199081	-0.202951	0.117897	0.727471
0.98	Wuyunjing8/R465	190.359	44.3153	15.9333	0.556707	26.8983	156.556	97.4562	15.9139	9.06944	0.701265	24.4498	89.2056	216.749	49.5188	11.2413	0.827005	24.8424	133.205	97.4562	15.9139	9.06944	0.701265	24.4498	89.2056	0.953277	1.78469	0.756815	-0.20614	0.100145	0.754998
1	R465/Balilla	179.643	28.6104	12.5556	0.406322	28.4812	127.133	216.749	49.5188	11.2413	0.827005	24.8424	133.205	133.553	20.08	9.59524	0.699422	23.7528	93.2663	133.553	20.08	9.59524	0.699422	23.7528	93.2663	0.345108	0.424824	0.308519	-0.419061	0.19907	0.363119
1	Balilla/R465	183.134	28.1566	11.3333	0.447664	30.03	127.817	133.553	20.08	9.59524	0.699422	23.7528	93.2663	216.749	49.5188	11.2413	0.827005	24.8424	133.205	133.553	20.08	9.59524	0.699422	23.7528	93.2663	0.371248	0.402224	0.181141	-0.359952	0.264274	0.370449

## Sheet: MPH
GDI	Female/Male parent name	MPH-GNP	MPH-GWP	MPH-TPP	MPH-SSR	MPH-TGW	MPH-MSPH
0.02	Balilla/Wuyunjing8	0.33447	-0.106997	-0.142766	-0.330171	0.0830452	0.165659
0.02	W1390/W1392	0.0116661	0.0297769	-0.0357075	-0.059157	-0.0319335	0.0643447
0.02	W1392/W1390	-0.0855488	0.0136197	-0.0149254	0.0776851	0.0554533	0.0149316
0.02	Wuyunjing8/Balilla	0.324569	0.559028	0.187626	-0.0977229	0.0880934	0.278606
0.03	W1383/W1384	0.0160666	0.329733	-0.0423729	0.187101	0.23341	-0.0293992
0.03	W1384/W1383	0.120063	0.529973	0.20339	0.175123	0.0476098	0.122667
0.04	610234/Mianhui725	-0.0270373	-0.0194263	-0.102323	0.0412882	0.062518	-0.00392006
0.04	Mianhui725/610234	0.17079	0.723239	0.170645	0.177365	0.0380649	0.115
0.06	610234/9311K	-0.0361327	0.21797	0.109326	0.0418033	-0.0829941	0.0691585
0.06	9311K/610234	-0.0745811	0.445918	0.36842	0.0687581	-0.00651102	0.0951033
0.06	Liaoxing1/W1390	0.146552	-0.25952	-0.356497	0.0916877	-0.15002	-0.0809577
0.06	W1390/Liaoxing1	-0.162673	-0.245398	-0.226496	0.127834	-0.0451935	-0.0534117
0.08	Liaoxing1/W1392	0.106566	0.209897	0.0974871	0.102205	-0.0962353	-0.00568816
0.08	Mianhui725/R465	-0.0501367	0.109335	0.074379	0.0403478	0.0157804	0.0771874
0.08	R465/Mianhui725	-0.142494	0.00529665	0.122247	0.0520583	-0.0325508	-0.00839975
0.08	W1392/Liaoxing1	0.0959421	-0.0283886	-0.0955252	0.0720722	-0.131494	-0.0656996
0.1	9311K/Mianhui725	-0.0581664	0.353054	0.307655	0.0110837	0.0413977	0.113672
0.1	Liaoxing1/Wuyunjing8	0.0813009	0.172662	0.0103006	0.140139	-0.0255809	-0.0405793
0.1	Mianhui725/9311K	-0.149653	-0.585675	-0.446356	-0.219131	0.0586016	0.0315162
0.1	W1383/W1392	0.472446	0.0608995	-0.122642	-0.0502252	0.0462878	0.0848621
0.1	Wuyunjing8/Liaoxing1	0.153933	0.0609787	0.269931	0.116722	-0.0696979	-0.140582
0.12	9311K/Qianlijing	-0.117656	0.920104	0.651363	0.0246309	0.10976	0.111941
0.12	Balilla/Liaoxing1	0.124465	0.0969237	-0.0737032	0.135268	-0.088204	-0.0607497
0.12	610234/R465	0.0816371	0.388056	0.0373735	0.163468	0.0439506	0.0359875
0.12	Liaoxing1/Balilla	0.032296	0.0728232	-0.0764519	0.131205	-0.042029	-0.0572791
0.12	Qianlijing/9311K	0.105101	0.756347	0.0346501	0.118996	0.0568671	0.0879026
0.12	R465/610234	0.0794926	0.228656	0.0317935	0.0942617	0.000400794	0.118299
0.12	W1383/W1390	0.16341	1.20589	0.44679	0.173214	0.153703	0.0437743
0.12	W1390/W1383	0.186274	1.29001	0.363697	0.220763	0.209513	0.0941277
0.13	W1384/W1392	-0.0453147	-0.193952	0.0183824	-0.179806	0.0242702	0.100007
0.13	W1392/W1384	0.0570552	-0.246218	-0.294118	-0.00267578	0.0258729	0.0773033
0.15	W1384/W1390	-0.0713291	0.245366	0.345473	0.0168927	0.0412479	0.0296245
0.15	W1390/W1384	0.0248839	0.176222	0.0128844	0.0182801	0.0816125	0.0361874
0.16	W1390/Wuyunjing8	-0.118123	0.291472	0.134216	0.0450396	0.0762366	0.126848
0.16	Wuyunjing8/W1390	-0.248288	-0.0643616	0.0363031	0.00290491	0.0632997	-0.0133157
0.18	Balilla/W1390	0.360303	0.286814	-0.14623	-0.0394723	0.0387017	0.0738996
0.18	610234/Qianlijing	—	—	—	—	—	0.187827
0.18	9311K/R465	0.0728583	0.52046	0.206002	-0.00201399	0.0353816	0.105843
0.18	Qianlijing/610234	0.131532	1.1766	0.197401	0.167443	0.13676	0.165923
0.18	R465/9311K	-0.00169635	0.129248	-0.0293155	0.0832555	0.0374527	0.127133
0.18	W1390/Balilla	0.196711	0.451187	0.399906	-0.189034	-0.0261442	0.0978902
0.18	W1392/Wuyunjing8	0.114413	0.117763	-0.261967	0.201459	0.102847	0.0491423
0.18	Wuyunjing8/W1392	0.0760649	0.521432	0.200348	0.0595448	0.0946517	0.0867051
0.2	Balilla/W1392	0.478115	0.383815	-0.0647569	-0.0523544	0.0176765	0.091924
0.2	W1392/Balilla	0.301551	0.0137193	0.0515166	-0.254651	-0.0251692	0.119234
0.21	Liaoxing1/W1384	0.0504406	-0.0157934	-0.150693	0.0890137	-0.0454845	-0.023648
0.21	W1384/Liaoxing1	0.149178	-0.132109	-0.286346	0.0660764	-0.079643	-0.021744
0.22	Mianhui725/Qianlijing	-0.0394906	0.587644	0.231067	0.0284781	0.0814033	0.107256
0.22	Qianlijing/Mianhui725	-0.110874	0.712215	0.204388	0.178786	0.184028	0.12799
0.28	W1383/Wuyunjing8	0.133389	1.22872	0.568159	0.0489812	0.152209	0.0960615
0.28	Wuyunjing8/W1383	0.266538	1.63184	0.393035	0.200106	0.158158	0.0710436
0.3	Balilla/W1383	0.376323	0.645383	-0.102466	0.0454221	0.173131	0.213962
0.3	Qianlijing/R465	-0.010715	0.718108	0.154526	0.117976	0.211808	0.118723
0.3	R465/Qianlijing	-0.0369691	0.549886	0.16827	0.0933512	0.162559	0.13625
0.3	W1383/Balilla	0.512154	1.52042	0.116164	0.213637	0.108514	0.207164
0.31	W1384/Wuyunjing8	-0.029619	0.0973881	-0.0425703	0.109925	0.0628798	0.068129
0.31	Wuyunjing8/W1384	-0.17588	0.350076	0.310843	0.10725	0.112079	0.0441599
0.33	Balilla/W1384	0.211566	0.727541	0.346993	-0.0824863	0.0659597	0.0931534
0.33	W1384/Balilla	0.167366	0.0889233	-0.148775	-0.0646341	0.0946771	0.127646
0.37	Qianlijing/W1384	0.11955	0.440601	0.0241429	0.0372737	0.160226	0.171924
0.37	W1384/Qianlijing	0.0872905	0.617996	0.487204	-0.208249	0.189376	0.177359
0.4	Qianlijing/W1383	0.164484	1.25958	0.326649	0.166547	0.176044	0.246256
0.4	W1383/Qianlijing	0.21384	1.43082	0.380983	0.262857	0.166407	0.381644
0.49	9311K/W1384	-0.170736	0.109634	0.532733	-0.210239	0.0278634	0.17833
0.49	W1384/9311K	-0.0214369	0.0921584	0.29236	-0.264978	0.091772	0.102203
0.5	W1392/Qianlijing	0.330155	1.77957	0.551585	0.106829	0.0729154	0.274026
0.52	9311K/W1383	-0.0342657	-0.0301573	0.321451	-0.320971	0.138885	0.176276
0.52	Qianlijing/W1390	0.00122064	0.58999	0.110696	0.140042	0.169874	0.244682
0.52	W1383/9311K	0.0978324	-0.160002	0.144349	-0.368212	-0.0194086	0.175393
0.55	610234/W1384	0.0798428	-0.121021	0.142909	-0.370458	0.0302203	0.194025
0.55	W1384/610234	-0.0456797	0.0579219	0.25617	-0.228495	0.0925135	0.211079
0.58	Liaoxing1/Qianlijing	-0.204328	-0.385083	-0.195813	-0.159364	-0.0162971	-0.0894489
0.58	Qianlijing/Liaoxing1	0.155159	-0.134637	-0.268726	-0.19583	0.0751539	-0.101778
0.58	W1383/610234	0.124292	0.608103	0.350376	0.234807	-0.167154	0.184001
0.59	Mianhui725/W1384	-0.0649573	-0.150138	-0.00213969	-0.200662	0.0748766	0.0920939
0.59	W1384/Mianhui725	0.213283	0.00329827	-0.0114655	-0.201875	0.0147713	0.126625
0.62	9311K/W1392	0.170015	-0.07267	0.249937	-0.364965	-0.0206403	0.220722
0.62	W1383/Mianhui725	0.115235	0.308812	0.238114	-0.198185	0.155386	0.144492
0.62	W1392/9311K	0.278938	0.200961	0.456237	-0.361359	-0.0103654	0.244655
0.64	9311K/W1390	0.0129456	0.0941393	0.706974	-0.456418	0.0545965	0.157435
0.64	W1390/9311K	-0.027511	0.636778	0.45248	0.0363576	0.0334162	0.00712093
0.67	R465/W1384	-0.161412	-0.324442	0.00473006	-0.280768	0.116975	0.181391
0.67	W1384/R465	0.157341	-0.125981	-0.0409395	-0.27882	0.106429	0.180829
0.68	610234/W1392	0.306698	0.143641	0.342103	-0.366224	-0.00818823	0.224953
0.68	Qianlijing/Wuyunjing8	0.164611	0.722436	0.012163	0.10099	0.0636991	0.394607
0.68	W1392/610234	0.305272	0.136036	0.335772	-0.366836	-0.00865651	0.216814
0.68	Wuyunjing8/Qianlijing	0.14084	0.839223	0.0478864	0.126384	0.101533	0.390725
0.7	610234/W1390	0.0989066	-0.318713	0.127991	-0.478056	-0.0215636	0.251942
0.7	9311K/Liaoxing1	0.148081	0.180499	0.149435	-0.181513	-0.0637455	-0.0266936
0.7	Balilla/Qianlijing	—	—	—	—	—	0.106678
0.7	Liaoxing1/9311K	0.109315	0.369295	0.512414	-0.211469	-0.0439785	0.0213917
0.7	Qianlijing/Balilla	0.0605836	1.04845	0.243852	0.0519809	0.197731	0.175416
0.7	R465/W1383	0.0923062	0.152128	0.264023	-0.184689	0.235486	0.161232
0.7	W1390/610234	-0.030825	-0.264422	0.257646	-0.44885	-0.00319546	0.344415
0.72	Mianhui725/W1392	0.160646	-0.0522854	0.152212	-0.24792	-0.0246541	0.200449
0.72	W1392/Mianhui725	0.169197	0.289704	0.276503	-0.125859	0.00275662	0.249119
0.74	Mianhui725/W1390	0.0602227	-0.00473762	0.377984	-0.348079	0.0452914	0.185601
0.74	W1390/Mianhui725	0.0268364	-0.139749	-0.13876	-0.117752	0.0520626	0.25437
0.76	610234/Liaoxing1	0.24208	0.127345	-0.122766	-0.0166058	-0.00629731	0.0462322
0.76	Liaoxing1/610234	0.112611	0.138024	0.15398	-0.136554	-0.0588357	0.0343335
0.8	9311K/Wuyunjing8	0.178697	0.0680298	0.29315	-0.191543	0.00612825	0.327329
0.8	Liaoxing1/Mianhui725	0.0699607	0.00582489	0.163689	-0.155473	-0.00229315	-0.0106852
0.8	Mianhui725/Liaoxing1	0.0439854	-0.0885264	-0.111814	-0.0424045	0.00457287	-0.0201142
0.8	R465/W1392	0.206359	-0.115646	0.0418491	-0.329368	0.063607	0.30201
0.8	W1392/R465	0.172828	-0.032524	0.0449133	-0.243705	0.0464371	0.349925
0.8	Wuyunjing8/9311K	0.11095	-0.202376	0.0193385	-0.260773	0.00473693	0.252463
0.82	9311K/Balilla	0.230383	0.346392	0.173576	-0.122045	0.0549299	0.319723
0.82	Balilla/9311K	0.444068	0.762617	0.263973	-0.0841407	0.0588673	0.261672
0.82	R465/W1390	0.154244	0.121556	0.514421	-0.414482	0.0844964	0.265401
0.82	W1390/R465	0.0426141	0.056281	0.658652	-0.393023	0.097608	0.332526
0.86	610234/Wuyunjing8	0.333967	0.244152	0.368351	-0.371405	-0.0291946	0.365692
0.86	Wuyunjing8/610234	0.165939	0.194247	0.511943	-0.285813	-0.00545049	0.364863
0.88	610234/Balilla	0.412435	-0.280519	0.186113	-0.62372	0.106954	0.197001
0.88	Balilla/610234	0.435233	-0.0704425	0.0860135	-0.412523	0.0760388	0.14017
0.88	Liaoxing1/R465	0.0658358	-0.211988	0.0573327	-0.352545	0.042323	0.0154897
0.88	R465/Liaoxing1	0.0790732	-0.124271	0.0827494	-0.309978	0.0472317	0.0202834
0.9	Mianhui725/Wuyunjing8	0.225967	-0.223617	0.175289	-0.409748	-0.010213	0.322385
0.9	Wuyunjing8/Mianhui725	-0.0347561	-0.173365	0.246519	-0.25303	0.00664944	0.402507
0.92	Balilla/Mianhui725	0.221709	-0.164575	0.639711	-0.612107	0.051046	0.149968
0.92	Mianhui725/Balilla	0.19525	-0.772706	0.755183	-0.865055	0.0281393	0.15246
0.98	R465/Wuyunjing8	0.0603262	-0.239476	-0.0891507	-0.268529	0.108993	0.385728
0.98	Wuyunjing8/R465	0.211686	0.354533	0.568958	-0.271455	0.091382	0.407809
1	Balilla/R465	0.04558	-0.190887	0.0878342	-0.413449	0.235926	0.128769
1	R465/Balilla	0.0256485	-0.177846	0.20515	-0.467618	0.172184	0.122732

## Sheet: BPH
GDI	Female/Male parent name	BPH-GNP	BPH-GWP	BPH-TPP	BPH-SSR	BPH-TGW	BPH-MSPH
0.02	Balilla/Wuyunjing8	0.154129	-0.199634	-0.166253	-0.331051	0.0676081	0.140283
0.02	W1390/W1392	-0.0673908	-0.000625222	-0.0645161	-0.0718913	-0.0493147	0.0376237
0.02	W1392/W1390	-0.157009	-0.0163054	-0.0443548	0.0630986	0.0365032	-0.0105488
0.02	Wuyunjing8/Balilla	0.145566	0.397299	0.155087	-0.0989086	0.0725842	0.250771
0.03	W1383/W1384	-0.0943238	-0.0909459	-0.236486	0.115007	0.143257	-0.0636166
0.03	W1384/W1383	-0.00162644	0.0459451	-0.0405405	0.103757	-0.0289629	0.0830886
0.04	610234/Mianhui725	-0.0427603	-0.0987593	-0.144965	-0.0409878	0.0464895	-0.0511003
0.04	Mianhui725/610234	0.15187	0.58382	0.115036	0.0843368	0.0224053	0.0621869
0.06	610234/9311K	-0.0742555	0.107341	0.0723839	-0.0687332	-0.0972134	0.0219438
0.06	9311K/610234	-0.111183	0.314585	0.32285	-0.0446384	-0.0219163	0.0467429
0.06	Liaoxing1/W1390	0.0754855	-0.345487	-0.481947	0.00905314	-0.192855	-0.134609
0.06	W1390/Liaoxing1	-0.214573	-0.333005	-0.377289	0.0424637	-0.0933107	-0.108671
0.08	Liaoxing1/W1392	0.0861505	0.0420063	-0.0951905	0.0317868	-0.126646	-0.0857815
0.08	Mianhui725/R465	-0.135058	0.010774	-0.00169444	0.0309512	-0.0473712	0.0743947
0.08	R465/Mianhui725	-0.219158	-0.0840212	0.0427845	0.0425559	-0.0926976	-0.0109706
0.08	W1392/Liaoxing1	0.0757225	-0.163214	-0.254317	0.00357882	-0.160718	-0.140959
0.1	9311K/Mianhui725	-0.109434	0.337031	0.206128	-0.0214444	0.0100268	0.109757
0.1	Liaoxing1/Wuyunjing8	-0.199009	-0.171641	-0.0633176	0.132775	-0.0833651	-0.224739
0.1	Mianhui725/9311K	-0.195941	-0.590582	-0.489341	-0.244253	0.0267125	0.0278896
0.1	W1383/W1392	0.375181	-0.205189	-0.25	-0.128338	-0.106641	0.0563846
0.1	Wuyunjing8/Liaoxing1	-0.145206	-0.250533	0.177394	0.109509	-0.124866	-0.305546
0.12	610234/R465	-0.0294189	0.172386	0.0106608	0.0805486	-0.00673314	-0.0106389
0.12	9311K/Qianlijing	-0.385334	0.603393	0.181811	-0.0757243	-0.0417887	0.0524047
0.12	Balilla/Liaoxing1	-0.0667581	-0.165874	-0.118263	0.129411	-0.153729	-0.227866
0.12	Liaoxing1/Balilla	-0.143253	-0.184201	-0.120879	0.125369	-0.110873	-0.225013
0.12	Qianlijing/9311K	-0.230155	0.466647	-0.259544	0.00939808	-0.0874583	0.029653
0.12	R465/610234	-0.0313433	0.0377526	0.00522451	0.0162749	-0.0481686	0.0679682
0.12	W1383/W1390	0.147206	0.620168	0.269396	0.0634578	0.000279106	0.0425168
0.12	W1390/W1383	0.169751	0.681947	0.196491	0.106559	0.0486677	0.0928094
0.13	W1384/W1392	-0.198397	-0.29997	-0.0641892	-0.199889	-0.0633878	0.0343883
0.13	W1392/W1384	-0.112442	-0.345361	-0.351351	-0.0270963	-0.0619223	0.0130391
0.15	W1384/W1390	-0.16181	0.110362	0.202703	-0.0210965	-0.0317907	-0.00782669
0.15	W1390/W1384	-0.074971	0.0487138	-0.0945946	-0.019761	0.00574248	-0.0015025
0.16	W1390/Wuyunjing8	-0.373057	-0.00710714	-0.0278714	-0.0282603	0.0655768	-0.0435624
0.16	Wuyunjing8/W1390	-0.465594	-0.280675	-0.111792	-0.0674396	0.0527681	-0.16253
0.18	610234/Qianlijing	—	—	—	—	—	0.175602
0.18	9311K/R465	-0.0710163	0.400536	0.196401	-0.0425547	7.38012e-05	0.104816
0.18	Balilla/W1390	0.073336	0.0798654	-0.284946	-0.10793	0.0139019	-0.0714542
0.18	Qianlijing/610234	-0.192631	0.979475	-0.124645	0.155598	-0.0312883	0.153924
0.18	R465/9311K	-0.135573	0.0401806	-0.037043	0.039251	0.00207425	0.126087
0.18	W1390/Balilla	-0.055745	0.217803	0.172457	-0.246832	-0.0493958	-0.0507107
0.18	W1392/Wuyunjing8	-0.164201	-0.121802	-0.350689	0.131557	0.0725146	-0.0901731
0.18	Wuyunjing8/W1392	-0.192962	0.195351	0.056049	-0.00210038	0.0645449	-0.0575983
0.2	Balilla/W1392	0.245436	0.19072	-0.19665	-0.10859	-0.0240207	-0.0348199
0.2	W1392/Balilla	0.0966661	-0.127734	-0.0967742	-0.298882	-0.0651109	-0.0106799
0.21	Liaoxing1/W1384	-0.104326	-0.0254591	-0.246468	0.0438939	-0.153794	-0.0468166
0.21	W1384/Liaoxing1	-0.0201363	-0.140632	-0.366824	0.021907	-0.184076	-0.0449578
0.22	Mianhui725/Qianlijing	-0.307809	0.338675	-0.0701735	-0.043818	-0.0899515	0.0444941
0.22	Qianlijing/Mianhui725	-0.359251	0.443711	-0.0903245	0.0959242	-0.00358854	0.0640528
0.28	W1383/Wuyunjing8	-0.187402	1.08638	0.206738	0.0204165	0.00753018	-0.0706147
0.28	Wuyunjing8/W1383	-0.0919391	1.46376	0.0719755	0.167426	0.0127325	-0.0918282
0.3	Balilla/W1383	0.0973758	0.391416	-0.322581	0.0182567	0.0387143	0.048584
0.3	Qianlijing/R465	-0.239542	0.343907	-0.169726	0.0482262	0.0785605	0.057896
0.3	R465/Qianlijing	-0.259723	0.212323	-0.159842	0.025138	0.0347263	0.0744703
0.3	W1383/Balilla	0.205677	1.13139	-0.157568	0.182101	-0.018499	0.0427118
0.31	W1384/Wuyunjing8	-0.35002	-0.220276	-0.0872894	0.070601	-0.00244265	-0.120503
0.31	Wuyunjing8/W1384	-0.447989	-0.0407345	0.249617	0.06802	0.0437326	-0.140239
0.33	Balilla/W1384	-0.112263	0.322675	0.25062	-0.116114	0.0141651	-0.0838047
0.33	W1384/Balilla	-0.144649	-0.166276	-0.209677	-0.098916	0.041487	-0.0548956
0.37	Qianlijing/W1384	-0.0419909	0.25294	-0.181081	0.0160174	0.104354	0.0903554
0.37	W1384/Qianlijing	-0.0695959	0.407227	0.189189	-0.224474	0.132102	0.0954127
0.4	Qianlijing/W1383	-0.093546	0.690926	0.321521	0.117601	0.143591	0.200202
0.4	W1383/Qianlijing	-0.0551263	0.819066	0.375644	0.209869	0.13422	0.330587
0.49	9311K/W1384	-0.356168	0.0575957	0.317987	-0.27402	-0.0726883	0.157138
0.49	W1384/9311K	-0.240254	0.0409393	0.111291	-0.324339	-0.0150317	0.0823797
0.5	W1392/Qianlijing	-0.0135117	1.77483	0.330645	0.0581561	-0.061729	0.259634
0.52	9311K/W1383	-0.176114	-0.353685	-0.0564967	-0.410387	-0.0394851	0.155205
0.52	Qianlijing/W1390	-0.212645	0.54561	-0.0222222	0.0758351	0.0393802	0.200079
0.52	W1383/9311K	-0.0634185	-0.440215	-0.182946	-0.451408	-0.172987	0.154338
0.55	610234/W1384	-0.135984	-0.163634	0.0121295	-0.389484	-0.0834113	0.121719
0.55	W1384/610234	-0.236418	0.00663339	0.112431	-0.251812	-0.027989	0.137739
0.58	Liaoxing1/Qianlijing	-0.402536	-0.469651	-0.411303	-0.177719	-0.164538	-0.171425
0.58	Qianlijing/Liaoxing1	-0.1326	-0.253648	-0.464678	-0.213388	-0.0868687	-0.182644
0.58	W1383/610234	-0.00674288	0.131065	-0.0152253	0.194711	-0.306462	0.15177
0.59	Mianhui725/W1384	-0.24247	-0.180653	-0.0759309	-0.242171	-0.0563185	0.0761803
0.59	W1384/Mianhui725	-0.0170517	-0.0327259	-0.0845671	-0.243322	-0.109088	0.110208
0.62	9311K/W1392	0.0610542	-0.226688	0.00186431	-0.402541	-0.0351091	0.16796
0.62	W1383/Mianhui725	-0.000461101	-0.122508	-0.0672948	-0.283461	-0.0494705	0.120111
0.62	W1392/9311K	0.159833	0.0014963	0.167221	-0.399149	-0.024986	0.190858
0.64	9311K/W1390	-0.145801	-0.064658	0.33744	-0.481915	0.0206409	0.135357
0.64	W1390/9311K	-0.179918	0.399225	0.13804	-0.0122546	0.000142567	-0.0120896
0.67	R465/W1384	-0.263981	-0.40441	-0.130189	-0.312189	0.0405866	0.161202
0.67	W1384/R465	0.0157855	-0.229441	-0.169726	-0.310326	0.0307613	0.160651
0.68	610234/W1392	0.230677	0.0384672	0.104615	-0.399959	-0.0377659	0.223695
0.68	Qianlijing/Wuyunjing8	-0.276995	0.351596	-0.218989	0.0838415	-0.0466004	0.221256
0.68	W1392/610234	0.229334	0.0315616	0.0994045	-0.400538	-0.0382202	0.215565
0.68	Wuyunjing8/Qianlijing	-0.291753	0.443238	-0.191424	0.108839	-0.0126893	0.217856
0.7	610234/W1390	-0.0409079	-0.363922	-0.0933821	-0.512151	-0.067262	0.219291
0.7	9311K/Liaoxing1	0.0239266	0.135854	0.10886	-0.276048	-0.0819552	-0.0664641
0.7	Balilla/Qianlijing	—	—	—	—	—	-0.011957
0.7	Liaoxing1/9311K	-0.0106469	0.317509	0.459026	-0.302544	-0.0625727	-0.0203436
0.7	Qianlijing/Balilla	-0.294118	0.760096	-0.0587262	0.0342562	0.0874618	0.0494122
0.7	R465/W1383	0.0732345	-0.262452	-0.0931234	-0.265496	0.073039	0.139391
0.7	W1390/610234	-0.154134	-0.313234	0.0108269	-0.484852	-0.0497517	0.309352
0.72	Mianhui725/W1392	0.110249	-0.202013	-0.0125991	-0.269623	-0.0675765	0.144707
0.72	W1392/Mianhui725	0.118429	0.0859466	0.0939136	-0.151085	-0.0413721	0.191117
0.74	Mianhui725/W1390	-0.0614699	-0.140617	0.151488	-0.358345	-0.0178251	0.158976
0.74	W1390/Mianhui725	-0.0910241	-0.257196	-0.28032	-0.131646	-0.0114627	0.226201
0.76	610234/Liaoxing1	0.149569	0.0626927	-0.124645	-0.0283381	-0.0103412	-0.0389447
0.76	Liaoxing1/610234	0.0297426	0.0727597	0.151509	-0.146855	-0.0626658	-0.0498746
0.8	9311K/Wuyunjing8	-0.048544	-0.262226	0.159925	-0.280851	-0.0355904	0.108939
0.8	Liaoxing1/Mianhui725	0.00547565	-0.0209376	0.110675	-0.230686	-0.0133739	-0.0478931
0.8	Mianhui725/Liaoxing1	-0.0189341	-0.112778	-0.152276	-0.127687	-0.00658418	-0.0569676
0.8	R465/W1392	0.145612	-0.309109	-0.159842	-0.342908	0.0424242	0.24463
0.8	W1392/R465	0.11377	-0.244171	-0.157371	-0.258974	0.0255962	0.290433
0.8	Wuyunjing8/9311K	-0.10323	-0.449017	-0.0856772	-0.342434	-0.0369241	0.0463907
0.82	9311K/Balilla	0.133179	-0.00269429	0.079679	-0.21993	-0.0026018	0.122738
0.82	Balilla/9311K	0.329983	0.305614	0.162843	-0.186251	0.00112091	0.0733513
0.82	R465/W1390	0.118576	-0.104004	0.193519	-0.418487	0.0822899	0.240134
0.82	W1390/R465	0.010395	-0.156151	0.307187	-0.397175	0.0953748	0.305919
0.86	610234/Wuyunjing8	0.0443736	-0.0878729	0.266139	-0.374889	-0.0832538	0.185374
0.86	Wuyunjing8/610234	-0.0871769	-0.12446	0.399005	-0.289771	-0.0608319	0.184654
0.88	610234/Balilla	0.253811	-0.428615	0.126759	-0.626295	0.031293	0.0590057
0.88	Balilla/610234	0.274049	-0.26178	0.0316687	-0.416543	0.00249045	0.0087265
0.88	Liaoxing1/R465	0.0305267	-0.299242	0.0279582	-0.405311	-0.0121116	-0.0251374
0.88	R465/Liaoxing1	0.0433256	-0.221237	0.0526687	-0.366214	-0.00745921	-0.0205355
0.9	Mianhui725/Wuyunjing8	-0.0513899	-0.460097	0.139973	-0.459141	-0.0785976	0.101689
0.9	Wuyunjing8/Mianhui725	-0.253128	-0.425151	0.209062	-0.315536	-0.0629002	0.168439
0.92	Balilla/Mianhui725	0.0691962	-0.376302	0.635113	-0.64499	-0.034482	-0.0245151
0.92	Mianhui725/Balilla	0.0460406	-0.830311	0.750262	-0.876494	-0.0555247	-0.022401
0.98	R465/Wuyunjing8	-0.231461	-0.497533	-0.177139	-0.324136	0.100229	0.156866
0.98	Wuyunjing8/R465	-0.121753	-0.10508	0.417396	-0.32684	0.0827576	0.175301
1	Balilla/R465	-0.155085	-0.431395	0.00818978	-0.458693	0.208822	-0.040449
1	R465/Balilla	-0.171191	-0.422231	0.116916	-0.508683	0.146478	-0.045581

## Sheet: Reciprocal
Group 1					Group 2
GDI	Female/Male parent name	GWP(g)	MPH-GWP		GDI	Female/Male parent name	GWP(g)	MPH-GWP
0.02	W1390/W1392	29.5825	0.0297769		0.02	W1392/W1390	29.1183	0.0136197
0.02	Wuyunjing8/Balilla	28.0577	0.559028		0.02	Balilla/Wuyunjing8	16.0713	-0.106997
0.03	W1384/W1383	39.5319	0.529973		0.03	W1383/W1384	34.3581	0.329733
0.04	Mianhui725/610234	64.4924	0.723239		0.04	610234/Mianhui725	36.6981	-0.0194263
0.06	9311K/610234	54.8278	0.445918		0.06	610234/9311K	46.1842	0.21797
0.06	W1390/Liaoxing1	25.7144	-0.245398		0.06	Liaoxing1/W1390	25.2332	-0.25952
0.08	Liaoxing1/W1392	40.1721	0.209897		0.08	W1392/Liaoxing1	32.2603	-0.0283886
0.08	Mianhui725/R465	50.0523	0.109335		0.08	R465/Mianhui725	45.3581	0.00529665
0.1	9311K/Mianhui725	55.764	0.353054		0.1	Mianhui725/9311K	17.0757	-0.585675
0.1	Liaoxing1/Wuyunjing8	31.9354	0.172662		0.1	Wuyunjing8/Liaoxing1	28.8939	0.0609787
0.1	W1383/W1392	22.138	0.0608995		0.12	Qianlijing/9311K	61.1699	0.756347
0.12	9311K/Qianlijing	66.8732	0.920104		0.12	Liaoxing1/Balilla	31.4512	0.0728232
0.12	Balilla/Liaoxing1	32.1578	0.0969237		0.12	R465/610234	51.3882	0.228656
0.12	610234/R465	58.0551	0.388056		0.12	W1383/W1390	47.9585	1.20589
0.12	W1390/W1383	49.7873	1.29001		0.13	W1392/W1384	24.7423	-0.246218
0.13	W1384/W1392	26.4579	-0.193952		0.15	W1390/W1384	39.6366	0.176222
0.15	W1384/W1390	41.9666	0.245366		0.16	Wuyunjing8/W1390	21.2927	-0.0643616
0.16	W1390/Wuyunjing8	29.3906	0.291472		0.18	R465/9311K	51.5084	0.129248
0.18	9311K/R465	69.3528	0.52046		0.18	Balilla/W1390	31.9651	0.286814
0.18	Qianlijing/610234	67.5609	1.1766		0.18	W1392/Wuyunjing8	24.4606	0.117763
0.18	W1390/Balilla	36.0482	0.451187		0.2	W1392/Balilla	24.2954	0.0137193
0.18	Wuyunjing8/W1392	33.2943	0.521432		0.21	W1384/Liaoxing1	33.1309	-0.132109
0.2	Balilla/W1392	33.1653	0.383815		0.22	Mianhui725/Qianlijing	54.5102	0.587644
0.21	Liaoxing1/W1384	37.5711	-0.0157934		0.28	W1383/Wuyunjing8	33.2024	1.22872
0.22	Qianlijing/Mianhui725	58.7872	0.712215		0.3	R465/Qianlijing	60.0328	0.549886
0.28	Wuyunjing8/W1383	39.208	1.63184		0.3	Balilla/W1383	27.9396	0.645383
0.3	Qianlijing/R465	66.5486	0.718108		0.31	W1384/Wuyunjing8	29.47	0.0973881
0.3	W1383/Balilla	42.7983	1.52042		0.33	W1384/Balilla	31.5109	0.0889233
0.31	Wuyunjing8/W1384	36.2558	0.350076		0.37	Qianlijing/W1384	47.3554	0.440601
0.33	Balilla/W1384	49.991	0.727541		0.4	Qianlijing/W1383	47.2589	1.25958
0.37	W1384/Qianlijing	53.1867	0.617996		0.49	W1384/9311K	43.4148	0.0921584
0.4	W1383/Qianlijing	50.8402	1.43082		0.52	W1383/9311K	23.3471	-0.160002
0.49	9311K/W1384	44.1095	0.109634		0.55	610234/W1384	31.6108	-0.121021
0.5	W1392/Qianlijing	77.5524	1.77957		0.58	Liaoxing1/Qianlijing	20.4463	-0.385083
0.52	9311K/W1383	26.9561	-0.0301573		0.59	Mianhui725/W1384	33.3635	-0.150138
0.52	Qianlijing/W1390	45.7516	0.58999		0.62	9311K/W1392	32.2528	-0.07267
0.55	W1384/610234	38.0461	0.0579219		0.64	9311K/W1390	39.0106	0.0941393
0.58	Qianlijing/Liaoxing1	28.7738	-0.134637		0.67	R465/W1384	29.4929	-0.324442
0.58	W1383/610234	38.6041	0.608103		0.68	W1392/610234	35.208	0.136036
0.59	W1384/Mianhui725	39.387	0.00329827		0.68	Qianlijing/Wuyunjing8	37.7751	0.722436
0.62	W1383/Mianhui725	35.7311	0.308812		0.7	9311K/Liaoxing1	47.3734	0.180499
0.62	W1392/9311K	41.7697	0.200961		0.7	610234/W1390	21.7098	-0.318713
0.64	W1390/9311K	58.3579	0.636778		0.72	Mianhui725/W1392	32.4937	-0.0522854
0.67	W1384/R465	38.1571	-0.125981		0.74	W1390/Mianhui725	30.2466	-0.139749
0.68	610234/W1392	35.4436	0.143641		0.76	610234/Liaoxing1	40.9696	0.127345
0.68	Wuyunjing8/Qianlijing	40.3364	0.839223		0.8	Wuyunjing8/9311K	22.98	-0.202376
0.7	Liaoxing1/9311K	54.9498	0.369295		0.8	Mianhui725/Liaoxing1	36.1273	-0.0885264
0.7	Qianlijing/Balilla	49.1921	1.04845		0.8	R465/W1392	34.2121	-0.115646
0.7	R465/W1383	36.5225	0.152128		0.82	9311K/Balilla	41.5949	0.346392
0.7	W1390/610234	23.4398	-0.264422		0.82	W1390/R465	41.7863	0.056281
0.72	W1392/Mianhui725	44.2192	0.289704		0.86	Wuyunjing8/610234	29.8828	0.194247
0.74	Mianhui725/W1390	34.9937	-0.00473762		0.88	610234/Balilla	19.5018	-0.280519
0.76	Liaoxing1/610234	41.3577	0.138024		0.88	Liaoxing1/R465	34.7006	-0.211988
0.8	9311K/Wuyunjing8	30.7706	0.0680298		0.9	Mianhui725/Wuyunjing8	21.9846	-0.223617
0.8	Liaoxing1/Mianhui725	39.867	0.00582489		0.92	Mianhui725/Balilla	6.90967	-0.772706
0.8	W1392/R465	37.4277	-0.032524		0.98	R465/Wuyunjing8	24.8816	-0.239476
0.82	Balilla/9311K	54.4537	0.762617		1	Balilla/R465	28.1566	-0.190887
0.82	R465/W1390	44.3686	0.121556
0.86	610234/Wuyunjing8	31.1316	0.244152
0.88	Balilla/610234	25.196	-0.0704425
0.88	R465/Liaoxing1	38.5634	-0.124271
0.9	Wuyunjing8/Mianhui725	23.4076	-0.173365
0.92	Balilla/Mianhui725	25.3967	-0.164575
0.98	Wuyunjing8/R465	44.3153	0.354533
1	R465/Balilla	28.6104	-0.177846
